# Supplementary material for: Interpretation of Results of Studies Evaluating an Intervention Highlighted in Google Health News: A Cross-Sectional Study of News
Source: PLoS One. 2015 Oct 16;10(10):e0140889. doi: 10.1371/journal.pone.0140889 (PMC4608738; doi:10.1371/journal.pone.0140889)
Supplement: S2 Table — (XLSX) [file pone.0140889.s002.xlsx]

## Sheet: Included Studies
Selected Health News and referenced scientific articles
Study number	Headlines for the news appearing on the main page	Titles of interventional study published	News outlets	Type of news outlet	Country
1	MS damage repair treatment looked by Edinburgh researchers	M2 microglia and macrophages drive oligodendrocyte differentiation during CNS remyelination	BBC	General	UK
2	Big leap' towards curing blindness in stem cell study	Photoreceptor precursors derived from three-dimensional embroynic stem cell cultures integrate and mature within adult degenerate retina	BBC	General	UK
3	Aspirin may reduce colon cancer risk in women	Alternate- Day, Low-Dose Aspirin and Cancer Risk: Long-Term Observational Follow-up of a Randomized Trial	Digital Journal	General	USA
4	ACE Inhibitor drug offer dementia treatment hope	Effects of centrally acting ACE inhibitors on rate of cognitive decline in dementia	The Independent	General	UK
5	Breastfeedubg Boosts Smarts as Babies Grow, Study Finds	Infant Feeding and Childhood Cognition at Ages 3 and 7 Years: Effect of Breastfeeding Duration and Exclusivity	Bloomberg	General	USA
6	Pill linked to long life in mice	Metformin improves healthspan and lifespan in mice	BBC	General	UK
7	Eating broccoli retunes metabolism	A diet rich in high-glucoraphanin broccoli interacts with genotype to reduce discordance in plasma metabolite profiles by modulating mitochondrial function	Health Canal	Medical	USA
8	Cutting off sugar could stop cancer growth	A cyclic peptide inhibitor of C-terminal binding protein dimerization links metabolism with mitotic fidelity in breast cancer cells	The Scotsman	General	UK
9	Face-lifts have minimal effects, according to new study	Objective Assessment of Perceived Age Reversal and Improvement in Attractiveness After Aging Face Surgery	Los Angeles Times	General	USA
10	Big breakfast may aid weight loss	High Caloric Intake at Breakfast vs. Dinner Differentially Influences Weight Loss of Overweight and Obese Women	Spire Healthcare	Medical	UK
11	Choclate may help keep brainhealth, sharp in old age, study says	Neurovascular coupling, cerebral white matter integrity, and response to cocoa in older people	Los Angeles Times	General	USA
12	Breastfeeding for six months can delay breast cancer onset by a decade	Breastfeeding and the prevention of breast cancer: A Retrospective review of clinical histories	The Guardian	General	UK
13	Drink watermelon juice to ease post-exercise muscle soreness	Watermelon Juice: Potential Functional Drink for Sore Muscle Relief in Athletes	Deccan Chronicle	General	India
14	Short-term exercise may not help with insomnia	Exercise to Improve Sleep in Insomnia: Exploration of Bidirectional Effects	Healio	Medical	USA
15	Insulin pumps better than injections for diabetic children	Long-term outcome of Insulin pump therapy in children with type-1 diabetes assessed in a large population-based case-control study	Onmedica	Medical	UK
16	Fish consumption 'linked with reduced risk of rheumatoid arthritis	Long-term intake of dietary long-chain n-3 polyunsaturated fatty acids and risk of rheumatoid arthritis: A prospective cohort study of women	Pulse Today	Medical	UK
17	Quit smoking program helps psychiatric patients, too	Efficacy of Initiating Tobacco Dependence Treatment in Inpatient Psychiatry: A Randomized Controlled Trial	Chicago Tribune	General	USA
18	Broccoli slows arthritis, researchers think	Sulphoraphane repress matrix-degrading proteases and protects cartilage from destruction in vitro and in vivo	BBC	General	UK
19	Eating fruit significantly cuts diabetes risk-but drinking juice INCREASES it, says study	Fruit consumption and risk of type 2 diabetes: results from three prospective longitudinal cohort studies	The Independent	General	UK
20	Glass of wine a day 'lowers depression risk'	Alcohal intake, wine consumption and the development of depression: the PREDIMED Study	The Telegraph	General	UK
21	Prostate cancer gold treatment	Treatment-Related Morbidity in Prostate Cancer: A Comparison of 3-Dimentional Conformal Radiation Therapy With and Without Image Guidance Using Implanted Fiducial Markers	NEWCASTLE Herald	General	Australia
22	PARIS trial find mode of DAPT cessation plays pivotal role	Cessation of dual antiplatelet treatment and cardiac events after percutaneous coronary intervention(PARIS): 2year results from a prospective observational study	Healio	Medical	USA
23	Novartis heart failute drug effective across patient groups	Effects of Serelaxin in subgroups of patients with acute heart failure: results from RELAX-AHF Trial	Reuters	General	USA
24	Parents' Goal Guide ADHD Treatment Choice	Parental Preferences and Goals regarding ADHD Treatment	HealthDay	Medical	USA
25	Daiichi Sankyo's edoxaban will 'shake things up'	Enoxaban versus Warfarin for the Treatment of Symptomatic Venous Thromboembolism: The Hokusai-VTE Trial	PharmaTimes	Medical	UK
26	Simple operation could help millions with high blood pressure	The carotid body as a putative therapeutic target for the treatment of neurogenic hypertension	The Telegraph	General	UK
27	For Polypill, Adherance Better Than Outcomes	Effects of a Fixed-Dose Combination Strategy on Adherance and Risk Factors in Patients With or at High Risk of CVD: The UMPIRE Randomized Clinical Trial	Medpage Today	Medical	USA
28	U.S. Anti-smoking ads tied to 1.6 million quit attempts	Effect of the first fedrally funded US antismoking national media campaign	Reuters	General	USA
29	E-Cigarette Might Help Smokers Quit	Electronic cigarettes for smoking cessation: A randomized controlled trial	Medpage Today	Medical	USA
30	Middle-aged men can blame estrogen for decline in libido	Gonadal Steroids and Body Composition, Strength, and Sexual Function in Men	National Monitor	General	USA
31	Diabetics fare better with bypass than stents, review suggests	Comparison of coronary artery bypass surgery and percutaneous coronary intervention in patients with diabetes: a meta-analysis of randomized controlled trials	CBC News	General	Canada
32	Exercise has modest effect on depression, study finds	Excercise for Depression (Review)	National Monitor	General	USA
33	Health kick 'reverses cell ageing'	Effect of comprehensive lifestyle changes on telomerase activity and telomerase length in men with biopsy-proven low-risk prostate cancer: 5-year follow-up of a descriptive pilot study	BBC	General	UK
34	Cattle vaccine could cut human E.coli O157 infections by 85 per cent: study	Predicting the public health benfit of vaccinating cattle against Escherichia Coli 0157	The Vancouver Sun	General	Canada
35	New class of drugs targets heart disease	Loss of Apelin Exacerbates Myocardial Infarction Adverse Remodeling and Ischemia-reperfusion Injury: Therapeutic Potential of Synthetic Apelin Analogues	The Indian EXPRESS	General	India
36	Money can motivate people to exercise: Study	Financial Incentives for Excercise Adherence in Adults: Systematic Review and Meta-Analysis	Edmonton Sun	General	UK
37	E-Readers Makes Reading Easier for Students with Dyslexia	E-Readers Are More Effective than Paper for Some with Dylexia	Science World Report	General	USA
38	Vitamin B supplements might reduce your risk of stroke	Vitamin B supplementation, homocysteine levels, and the risk of cerebrovascular disease: A meta-analysis	CBC News	General	Canada
39	Study Affirms Benefit of Back Braces as Scoliosis Treatment	Effect of Bracing in Adolescents with Idiopathic Scoliosis	New York Times	General	USA
40	Heart diseases drug statins 'raise the risk of developing cataract by 27%	Association of Statin Use With Cataracts: A Propensity Score-Matched Analysis	Daily Mail Online	General	UK
41	Skin drug shows 'promising' results on type 1 diabetes	Targetting of memory T-cells with Alefacept in new-onset type-1 diabetes (T1DAL Study): 12 month results of a randomized, double-blind, placebo-controlled phase 2 trial	BBC	General	UK
42	Commonly-prescribed statin may impair memory	Chronic Pravastatin but not Atorvastatin Treatment Impairs Congnitive Function in Two Rodent Models of Learning and Memory	The Telegraph	General	UK
43	Antidepressants may up diabetes risk	Antidepressant Medication as a Risk Factor for Type 2 Diabetes and Impaired Glucose Regulation: A Systematic Review	Irish Health	Medical	Irland
44	Weight loss can help reduce knee pain from arthritis	Effect of Intensive Diet and Excercise on Knee Joint Loads, Inflammation, and Clinical Outcomes Among Overweight and Obese Adults With Knee Osteoarthritis: The IDEA Randomized Clinical Trial	USA Today	General	USA
45	Auto-Off Insulin Pump Helps in High-Risk T1D	Effect of Sensor-Augmented Insulin Pump Therapy and Autmated Insulin Suspension vs Standard Insulin Pump Therapy on Hypoglycemia in Patients With Type 1 Diabetes: A Randomized Clinical Trial	Medpage Today	Medical	USA
46	Daytime Naps Enhance Prescholers' Memory	Sleep spindles in midday naps enhance learning in preschool children	US News	General	USA
47	Tackling fears 'while you sleep'	Stimulus-specific enhancement of fear extinction during slow-wave sleep	BBC	General	UK
48	Girls who eat peanut butter may improve breast health later in life	Vegetable protein and vegetable fat intakes in pre-adolescent and adolescent girls, and risk for benign breast cancer disease in young women	Washington University in St. Louis News	General	USA
49	Stem Cell-Enriched Fat May Improve Plastic Sirgery, Study Finds	Enrichment of autologous fat grafts with ex-vivo expanded adipose tissue-derived stem cells for graft survival: a randomized placebo-controlled trial	Bloomberg Business	General	USA
50	Eating fish may not help with memory, thinking skills	Omega-3 fatty acids and domain-specific congnitive aging: Secondary analysis of data from WHISCA	USA Today	General	USA
51	Study of Hormone Use in Menopause Reaffirms Complex Mix of Risks and Benefits	Menopausal Hormone Therapy and Health Outcomes During the Intervention and Extended Poststopping Phases of the Women's Health Initiative Randomized Trials	The New York Times	General	USA
52	Exercise 'can be as good as pills'	Comparative effectiveness of excercise and drug interventions on mortality outcomes: metaepidemiological study	BBC	General	UK
53	Blood pressure drug 'fights cancer'	Angiotensin inhibition enhances drugh delivery and potentiates chemotherapy by decompressing tumour blood vessels	BBC	General	UK
54	Leisure-Time Exercise Could Lower Your Risk of High Blood Pressure	Physical Activity and risk of Hypertension	Science Daily	General	USA
55	Walking cuts risk of breast cancer, says new study	Recreational Physical Activity and Leisure-Time Sitting in Relation to Postmenopausal Breast Cancer Risk	Independent.ie	General	Irland
56	High-dose statin may reduce gum inflammation	High Dose Atorvastatin Reduces Periodontal Inflammation: A Novel Pleiotropic Effect of Statins	Medical News Today	Medical	UK
57	New cholesterol drug without the side-effects	Effect of an RNA interference drug on the synthesis of proprotein convertase subtilisin/kexin type 9(PCSK9) and the concentration of serum LDL cholesterol in healthy volunteers: a randomized, single-blind, placebo-controlled, phase 1 trial	South Asia Mail	General	India
58	Gloves and gowns use in ICU not completely effective against infection, says study	Universal Gloves and Gown Use and Acquisition of Antibiotics-Resistant Bacteria in the ICU: A Randomized Trial	Pentagon Post	General	USA
59	Probiotics may help comat colic, but evidence mixed	Probiotics to Prevent or Treat Excessive Infant Crying: Systematic Review and Meta-analysis	Reuters	General	USA
60	No Signs That Vitamin D Supplements Help Aging Bones: Study	Effect of vitamin D supplements on bone mineral density: a systematic review and meta-analysis	HealthDay	Medical	USA
61	Scientists Hail Major Breakthrough in Treating Alzheimers's in Mice	Oral Treatment Targeting the Unfolded Protein Response Prevents Neurodegeneration and Clinical Disease in Prion-Infected Mice	Health-TIME	General	USA
62	Is Sprite the cure for your hangover woes?	Effect of Herbal Infusion, Tea and Carbonated Beverage on Alcohol Dehydrogenase and Aldehyde Dehydrogenase Activities	CBS News	General	USA
63	Exercise may ward off Alzheimer'sand Parkinson's	Exercise Induces Hippocampal BDNF through a PGC-1α/FNDC5 Pathway	Medical News Today	Medical	UK
64	Red Wine Compound Makes Tumor Cells More Susceptible to Radiation Treatment	A potential role for resveratrol as a radiation sensitizer for melanoma treatment	RTT News	General	USA
65	Cabbage compound protects health tissues from radiation damage	DIM (3,3'-diindolymethane) confers protection against ionizing radiation by a unique mechanism	Medical News Today	Medical	UK
66	Popular Morning Sickness Drug Safe in Pregnancy: Study	Metoclopramide in Pregnancy and Risk of Major Congenital Malformation and Fetal Death	WebMD	Medical	USA
67	Bypass May Beat Angioplasty for Diabetics With Heart Disease	Quality of Life After PCI vs CABG Among Patients With Diabetes and Multivessel Coronary Artery Disease: A Randomized Clinical Trial	HealthDay	Medical	USA
68	Study: Vitamin D Supplements May Not Raise Risk for Kidney Stones	25-Hydroxyvitamin D in the Range of 20 - 100ng/ml and Incidence of Kindney Stone	WebMD	Medical	USA
69	Slepp 'Detoxes' The Brain, New Research Suggests	Sleep Drives Metabolite Clearance from the Adult Brain	Forbes News	General	USA
70	Delaying baby's first measles shot may afford greater protection, study finds	Measles in Children Vaccinated With 2 Doses of MMR	Thestar.com	General	Canada
71	Cognitive behavioral therapy 'effective' for health anxiety	Clinical and cost-effectiveness of cognitive behaviour therapy for health anxiety in medical patients: a multicentre randomized controlled trial	Medical News Today	Medical	UK
72	Flu shot lessens chance of heart attck, stroke	Association Between Influenza Vaccination and Cardiovascular Outcomes in High- Risk Patients : A Meta-analysis	Thestar.com	General	Canada
73	Weight-Loss Surgery Beats Obsesity Better Than Diest, Exercise	Bariatric surgery versus non-surgical treatment for obesity: a systematic review and meta-analysis of randomized controlled trials	Bloomberg Business	General	USA
74	New Technique Holds Promise for Hair Growth	Microenviromental reprogramming by three-dimensional culture enables dermal papilla cells to induce de novo human hair-follicle growth	The New York Times	General	USA
75	Love Hormone' May Mediate Placebo Effect	Effect of Oxytocin on Placebo Analgesia: A Randomized Study	Medpage Today	Medical	USA
76	Mindfulness therapy doesn't lower blood pressure, Canadian study finds	Hypertension Analysis of Stress Reduction Using Mindfulness Meditation and Yoga: Results From the Harmony Randomized Controlled Trial	Calgary Herald	General	Canada
77	Verona Pharma says RPL554 Drug Trial Prositive	Efficacy and safety of RPL554, a dual PDE3 and PDE4 inhibitor, in healthy volunteers and in patients with asthma or chronic obstructive pulmonary disease: finding from four clinical trials	London South East News	General	UK
78	Buprenorphine Works in Initial Opiod Detox	A Randomized, Double-blind Evaluation of Buprenorphine Taper Duration in Primary Prescription Opioid Abusers	Medpage Today	Medical	USA
79	UBC study shows drug may reduce compulsive gambling	A Selective Role for Dopamine D4 Receptors in Modulating Reward Expectancy in a Rodent Slot Machine Task	The Vancouver Sun	General	Canada
80	Gardening as good as exercise in cutting heart attack risk, study shows	The importance of non-exercise physical activity for cardiovascular health and longevity	The Guardian	General	UK
81	Improving gum health may reduce heart attack	Changes in Clinical and Microbiological Periodontal Profiles Relate to Progression of Carotid Intima-Media Thickness: The Oral Infections and Vascular Disease Epidemiology Study	Medical News Today	Medical	UK
82	HPV Vaccine: One Dose May Be Enough	Durable Antibody Responses Following One Dose of the Bivalent Human Papillomavirus L1 Virus-Like Particle Vaccine in the Costa Rica Vaccine Trial	Live Science	General	USA
83	Testosterone medication may boost risk of heart attack, stroke, death	Association of Testosteron Therapy With Mortality, Myocardial Infarction, and Stroke in Men With Low Testosterone Levels	Los Angeles Times	General	USA
84	Mediterranean-diet-style eating may improve health in later life	The Association Between Dietary Patterns at Midlife and Health in Aging	Washington Post	General	USA
85	Kids Who Add Sleep Can Subtract Pounds, Sutdy Suggests	Changes in Children's Sleep Duration on Food Intake, Weight, and Leptin	U.S.News	General	USA
86	Bio patch regenerates missing or damaged bone	The enhancement of bone regeneration by gene activated matrix encoding for platelet derived growth factor	Medical News Today	Medical	UK
87	Exercise boosts memory in adults 50 and older	Shorter term aerobic exercise improves brain, cognition, and cardiovascular fitness in aging	CBC News	General	Canada
88	Zinc helps reduce bacterial infection	Imperfect coordination chemistry facilitates metal ion release in the Psa permease	Digital Journal	General	Canada
89	Take long walks to reduce your risk of stroke	Protective Effect of Time Spent Walking on Risk of Stroke in Older Men	Saga	General	UK
90	Go nuts: Study ties nuts to a lower risk of death, including from heart disease or cancer	Association of Nut Consumption with Total and Cause-Specific Mortality	CTV News	General	Canada
91	Exercise helps pregnant women quit smoking-study	The effects of acute exercise on tobacco cravings and withdrawaul symptoms in temporarily abstinent pregnant smokers	Eyewintness News	General	South Africa
92	Telemedicines May Reduce Doctor Erros for Kids in Rural EDs	Telemedicine Consultations and Medication Errors in Rural Emergency Departments	Medscape	Medical	USA
93	Exercise later in life can significantly increase healthy ageing	Taking up physical activity in later life and healthy ageing: the English longitudinal study of ageing	WalesOnline	General	UK
94	Higher clot risk seen with Thoratec heart pump: study	Unexpected Abrupt Increase in Left Ventricular Assist Device Thrombosis	Reuters	General	UK
95	Corals could hold key to future bone grafting procedures	Characterization of a biodegradable coralline hydroxyapatite/calcium carbonate composite and its clinical implementation	Zee News	General	India
96	Oxygen deprivation could help improve mobility for patients with spinal injuries: study	Daily intermittent hypoxia enhances walking after chronic spinal cord injury: A randomized trial	CTV News	General	Canada
97	Low vitamin D levels may damage brain	Dietary vitamin D deficiency in rats from middle to old age leads to elevated tyrosine nitration and proteomics changes in levels of key proteins in brain: Implication for low vitamin D-dependent age-related cognitive decline	Health Central	Medical	USA
98	Exercise can help demential patients	Exercise programs for people with dementia (Review)	THE TIMES OF INDIA	General	India
99	Love hormone' could help autistic children: study	Oxytocin enhances brain function in children with autism	NEW YORK POST	General	USA
100	Certain diabetes drugs reduce cancer risk in women, study finds	Gender-specific effects of oral hypoglycaemic agents on cancer risk in type 2 diabetes mellitus	Los Angeles Times	General	USA
101	Doubt cast on vitamin D's role against disease	Vitamin D status and ill health: a systematic review	BBC	General	UK
102	New study suggests computer games may help older adults with walking	Impact of Cognitive Training on Balance and Gait in Older Adults	Justice News Flash	General	USA
103	Menstrual cramps relieved by erectile dysfunction drug	Sildenafil citrate in the treatment of pain in primary dysmenorrhea: a randomized controlled trial	Medical News Today	Medical	UK
104	Contact lenses can deliver glaucoma drugs for a month	In vivo performance of a drug-eluting contact lens to treat glaucoma for a month	Medical News Today	Medical	UK
105	Brain cancer treatment may lie in reactivating immune cells	Therapeutic activation of macrophages and microglia to supress brain tumor-initiating cells	Medical News Today	Medical	UK
106	Exercise 'significant role' o, reducing risk of dementia, long-term study finds	Healthy Lifestyles Reduce the Incidence of Chronic Diseases and Dementia: Evidence from the Caerphilly Cohort Study	BBC	General	UK
107	Stomach acid drugs may increase vitamin deficiency risk	Proton Pump Inhibitor and Histamine 2 Receptor Antagonist Use and Vitamin B12 Deficiency	Reuters	General	UK
108	Australian reseachers find drug to prevent breast cancer	Anastrozole for prevention of breast cancer in high-risk postmenopausal women (IBIS-II): an international, double-blind, randomized placebo-controlled trial	Business Standard	General	India
109	Protein Could Help in Prostate Cancer Treatment	A novel prostate acid phosphatase-based peptide vaccination strategy induces antigen-specific T-cell responses and limits tumour growth in mice	News Tonight Africa	General	South Africa
110	Study: Exercise For Better Sex	Exercise Improves Sexual Function in Women Taking Antidepressants: Results From A Randomized Crossover Trial	LATIN POST	General	USA
111	Big breakthruogh in cure for blindness	Adult rat retinal ganglion cells and glia can be printed by piezoelectric inkjet printing	THE TIMES OF INDIA	General	India
112	An Apple A Day Keeps Heart Attacks And StrokesAt Bay, Study Finds	A statin a day keeps the doctor away: comparative proverb assessment modelling study	HEALINES & GLOBAL NEWS	General	USA
113	Extra quarter ounce of fibre could be the secret to avoiding heart attack	Dietary fibre intake and risk of cardiovascular disease: systematic review and meta-analysis	The Telegraph	General	UK
114	Tomatoes may help fight breast cancer	Effects of Tomato and Soy on Serum Adipokine Concentrations in Postmenopausal Women at Increased Breast Cancer Risk: A Cross-Over Dietary Interventional Trial	iol Lifestyle	General	South Africa
115	Sleep protects your brain: study	Sleep Deprivation increases serum levels of NSE and S-100B in healthy young men	Geo News	General	Pakistan
116	Fibre rich diet may ward off asthma	Gut microbiota metabolism of dietary fiber influences allergic airway disease and hematopoiesis	THE FINANCIAL EXPRESS	General	India
117	Vitamin D boots strength of children	Maternal Antenatal Vitamin D Status and Offspring Muscle Development: Findings from the Southampton Women's Survey	heraldscotland	General	UK
118	Expectorant mom regularly eating nuts may lower baby's nut allergy risk	Prospective study of Peripregnancy Consumption of Peanuts or Tree Nuts by Mothers and the Risk of Peanut or Tree Nut Allergy in Their Offspring	English.News.cn	General	China
119	New 'sticky balls' treatment may help stop spread of cancer	Trail-coated leukocyes that kill cancer cells in the circulation	Zee News	General	India
120	Gene therapy might offer hope in Parkisnon's	Long-term safety and tolerability of ProSavin, a lentiviral vector-based gene therapy for Parkinson's disease: a dose escalation, open-label, phase 1/2 trial	Onmedica	Medical	UK
121	Avocado with lunch may help with weight management	A randomized 3x3 crossover study to evaluate the effect of Hass avocado intake on post-ingestive satiety, glucose and insulin levels, and sebsequent energy intake in overweight adults	Medical News Today	Medical	UK
122	Study uses stem cells to help treat drug-resistant TB	Autologous mesenchymal stromal cell infusion as adjunct treatment in patients with multidrug and extensively drug-resistant tuberculosis: an open-label phase 1 safety trial	BusinessDay Live News	General	South Africa
123	Moderate Coffee Consumption does Not Cause Dehydration, Study	No Evidence of Dehydration with Moderation Daily Coffee Intake: A Counterbalanced Cross-Over Study in a Free-Living Population	Science World Report	General	USA
124	Caffeine Enhances Memory	Post-study caffeine administration enhances memory consolidation in humans	Laboratory EQUIPMENT News	General	USA
125	Alternative Treatments for Autism Patients Common	Utilization Patterns of Conventional and Complementary/Alternative Treatments in Children with Autism Spectrum Disorders and Developmental Disabilities in a Population-Based Study	Science World Report	General	USA
126	Brain training helped older adults stay sharp for years, study finds	Ten-Year Effects of the Advanced Cognitive Training for Independent and Vital Elderly Cognitive Trial on Cognition and Everyday Functioning in Older Adults	Fox NEWS	General	USA
127	Pump it up! Weightlifting 'cuts diabetes risk in women'	Mauscle-Strengthening and Conditioning Activities and Risk of Type 2 Diabetes: A Prospective study in Two cohorts of US Women	BBC	General	UK
128	Radiation for prostate cancer may lead to more complications than surgery: study	Incidence of complications other than urinary incontinence or erectile dysfunction after prostatectomy or radiotherapy for prostate cancer: A population-based cohort study	CityNews	General	Canada
129	Gluten-Free Diet May Help Protect With Celiac Disease	Persistant Mucosal Damage and Risk of Fracture in Celiac Disease	WebMD	Medical	USA
130	Microparticles may reduce heart attack damage	Therapeutic Inflammatory Monocyte Modulation Using Immune-Modifying Microparticles	THE TIMES OF INDIA	General	India
